# Supplementary material for: Innovative Bicultured Lactic–Acetic Acid Co-fermentation Improves Jujube Puree’s Functionality and Volatile Compounds
Source: MDPI journal article supplement (doi:10.3390/fermentation10010071), 2024-01-21
Supplement: s1 [file s1]

# Supplementary tables and figures.

**Table S1.** Pearson's correlation coefficients matrix of phenolic acids, antioxidant properties, and overall color difference of bicultured jujube purees, JP

|       | Morin   | Chlo   | Sinp   | Fer    | Gal    | Neo    | Caf    | Quer   | Prot   | Cat    | Rutin | Syri   | THB | Coum | C3R | P3G | P3DG | DPPH | ABTS | $\Delta E$ |
|-------|---------|--------|--------|--------|--------|--------|--------|--------|--------|--------|-------|--------|-----|------|-----|-----|------|------|------|------------|
| Morin | 1       |        |        |        |        |        |        |        |        |        |       |        |     |      |     |     |      |      |      |            |
| Chlo  | 0.008   | 1      |        |        |        |        |        |        |        |        |       |        |     |      |     |     |      |      |      |            |
| Sinp  | -0.159  | -      | 1      |        |        |        |        |        |        |        |       |        |     |      |     |     |      |      |      |            |
|       |         | 0.801* |        |        |        |        |        |        |        |        |       |        |     |      |     |     |      |      |      |            |
| Fer   | -0.230  | -      | 0.997* | 1      |        |        |        |        |        |        |       |        |     |      |     |     |      |      |      |            |
|       |         | 0.788* |        |        |        |        |        |        |        |        |       |        |     |      |     |     |      |      |      |            |
| Gal   | -0.359  | -      | 0.977* | 0.989* | 1      |        |        |        |        |        |       |        |     |      |     |     |      |      |      |            |
|       |         | 0.789* |        |        |        |        |        |        |        |        |       |        |     |      |     |     |      |      |      |            |
| Neo   | -0.834* | 0.231  | 0.231  | 0.291  | 0.364  | 1      |        |        |        |        |       |        |     |      |     |     |      |      |      |            |
| Caf   | -0.027  | 0.256  | 0.359  | 0.359  | 0.295  | 0.564  | 1      |        |        |        |       |        |     |      |     |     |      |      |      |            |
| Quer  | 0.989*  | 0.131  | -0.302 | -0.371 | -0.493 | -      | -0.072 | 1      |        |        |       |        |     |      |     |     |      |      |      |            |
|       |         |        |        |        |        | 0.836* |        |        |        |        |       |        |     |      |     |     |      |      |      |            |
| Prot  | -0.808* | 0.095  | 0.383  | 0.439  | 0.502  | 0.987* | 0.608* | -      | 1      |        |       |        |     |      |     |     |      |      |      |            |
|       |         |        |        |        |        |        |        | 0.833* |        |        |       |        |     |      |     |     |      |      |      |            |
| Cat   | -0.597* | 0.580* | -0.055 | -0.008 | 0.031  | 0.910* | 0.697* | -0.562 | 0.860* | 1      |       |        |     |      |     |     |      |      |      |            |
| Rutin | -0.269  | -      | 0.993* | 0.998* | 0.995* | 0.296  | 0.311  | -0.408 | 0.442  | -0.020 | 1     |        |     |      |     |     |      |      |      |            |
|       |         | 0.808* |        |        |        |        |        |        |        |        |       |        |     |      |     |     |      |      |      |            |
| Syri  | -0.501  | 0.271  | 0.335  | 0.370  | 0.377  | 0.892* | 0.877* | -0.528 | 0.909* | 0.911* | 0.347 | 1      |     |      |     |     |      |      |      |            |
| THB   | -0.361  | 0.587* | 0.004  | 0.033  | 0.030  | 0.801* | 0.859* | -0.342 | 0.771* | 0.957* | 0.003 | 0.936* | 1   |      |     |     |      |      |      |            |

|      |        |        |        |        |        |        |        |        |        |        |        |        |        |         |        |        |        |         |        |   |
|------|--------|--------|--------|--------|--------|--------|--------|--------|--------|--------|--------|--------|--------|---------|--------|--------|--------|---------|--------|---|
| Coum | 0.330  | 0.793* | -      | -      | -      | -0.344 | -0.305 | 0.465  | -0.485 | -0.018 | -      | -0.371 | -0.025 | 1       |        |        |        |         |        |   |
|      |        |        | 0.983* | 0.993* | 0.999* |        |        |        |        |        | 0.998* |        |        |         |        |        |        |         |        |   |
| C3R  | 0.806* | -0.130 | -0.352 | -0.408 | -0.472 | -      | -      | 0.827* | -      | -      | -0.411 | -      | -      | 0.455   | 1      |        |        |         |        |   |
|      |        |        |        |        |        | 0.992* | 0.613* |        | 0.999* | 0.877* |        | 0.914* | 0.787* |         |        |        |        |         |        |   |
| P3G  | -0.058 | -      | 0.014  | 0.015  | 0.078  | -0.493 | -      | -0.065 | -0.481 | -      | 0.065  | -      | -      | -0.069  | 0.498  | 1      |        |         |        |   |
|      |        | 0.589* |        |        |        |        | 0.928* |        |        | 0.753* |        | 0.795* | 0.909* |         |        |        |        |         |        |   |
| P3DG | 0.732* | -0.069 | 0.335  | 0.278  | 0.136  | -0.291 | 0.616* | 0.661* | -0.207 | -0.108 | 0.220  | 0.168  | 0.181  | -0.166  | 0.211  | -0.544 | 1      |         |        |   |
| DPPH | -0.035 | 0.790* | -      | -      | -      | -0.088 | -0.388 | 0.112  | -0.247 | 0.147  | -      | -0.267 | 0.037  | 0.929*  | 0.216  | 0.029  | -0.498 | 1       |        |   |
|      |        |        | 0.980* | 0.964* | 0.916* |        |        |        |        |        | 0.950* |        |        |         |        |        |        |         |        |   |
| ABTS | -0.073 | 0.819* | -      | -      | -      | -0.027 | -0.335 | 0.074  | -0.186 | 0.212  | -      | -0.203 | 0.101  | 0.916*  | 0.155  | -0.023 | -0.497 | 0.996*  | 1      |   |
|      |        |        | 0.971* | 0.952* | 0.903* |        |        |        |        |        | 0.939* |        |        |         |        |        |        |         |        |   |
| ΔE   | -0.370 | -0.164 | 0.681* | 0.700* | 0.689* | 0.695* | 0.793* | -0.454 | 0.778* | 0.596* | 0.679* | 0.841* | 0.654* | -0.689* | -      | -0.572 | 0.319  | -0.637* | -      | 1 |
|      |        |        |        |        |        |        |        |        |        |        |        |        |        |         | 0.768* |        |        |         | 0.577* |   |

Correlation matrix coefficients with asterisk \* denote significant correlation (p<0.05).

#### Note

Chlo- chlorogenic acid; Sinp- sinapic acid; Fer- ferulic acid; Gal- gallic acid; Neo- neochlorogenic acid; Caf- caffeic acid; Quer- quercetin; Prot- protocatechuic acid; Cat- catechin; Syri- syringic acid; THB- 2,3,4-trihydroxybenzoic acid; Coum- *p*-coumaric acid; C3R- cyanidin-3-O-rutinoside; P3G- peonidin-3-O-glucoside; P3DG- peonidin-3,5-diglucoside; DPPH- 2,2-diphenyl-1-picrylhydrazyl radical scavenging activities; ABTS- 2,2-azino-bis-3- ethylbenzothiazoline-6-sulfonic acid radical scavenging activities; ΔE- overall color difference.

**Table S2.** Semi-quantitative amounts of volatile compounds identified in bi-cultured Junzao jujube purees by HS-SPME-GC/MS method.

| Volatile groups | SN   | Compound name           | CAS number | Odor description       | Concentration of JP, % (mean $\pm$ SD) |                               |                               |                               |
|-----------------|------|-------------------------|------------|------------------------|----------------------------------------|-------------------------------|-------------------------------|-------------------------------|
|                 |      |                         |            |                        | JCON                                   | JLcAp                         | JLhAp                         | JLpAp                         |
| Alcohols        | AL1  | 1-Decanol               | 112-30-1   | Floral, fatty          | 3.73 $\pm$ 0.02 <sup>a</sup>           | n.d                           | n.d                           | n.d                           |
|                 | AL2  | 1-Dodecanol             | 112-53-8   | Sweet, fats, coconut   | n.d                                    | n.d                           | 0.37 $\pm$ 0.01 <sup>a</sup>  | 0.29 $\pm$ 0.01 <sup>b</sup>  |
|                 | AL3  | 1-Heptanol              | 111-70-6   | Green                  | n.d                                    | 0.62 $\pm$ 0.01 <sup>a</sup>  | n.d                           | 0.60 $\pm$ 0.01 <sup>a</sup>  |
|                 | AL4  | 1-Hexanol               | 111-27-3   | Resin, flower, green   | 0.49 $\pm$ 0.01 <sup>a</sup>           | 0.45 $\pm$ 0.01 <sup>b</sup>  | 0.37 $\pm$ 0.02 <sup>c</sup>  | 0.38 $\pm$ 0.01 <sup>c</sup>  |
|                 | AL5  | 1-Hexanol, 2-ethyl-     | 104-76-7   | Green, rose            | 2.37 $\pm$ 0.01 <sup>a</sup>           | 0.23 $\pm$ 0.01 <sup>b</sup>  | 0.21 $\pm$ 0.01 <sup>b</sup>  | 0.19 $\pm$ 0.01 <sup>c</sup>  |
|                 | AL6  | 1-Hexanol, 5-methyl-    | 627-98-5   |                        | n.d                                    | n.d                           | 0.57 $\pm$ 0.01 <sup>a</sup>  | n.d                           |
|                 | AL7  | 1-Nonanol               | 143-8-8    | Fatty                  | 0.20 $\pm$ 0.00 <sup>a</sup>           | n.d                           | n.d                           | n.d                           |
|                 | AL8  |                         | 111-87-5   | Chemical, metal, burnt | 0.67 $\pm$ 0.01 <sup>b</sup>           | n.d                           | n.d                           | 1.09 $\pm$ 0.01 <sup>a</sup>  |
|                 |      | 1-Octanol               |            |                        |                                        |                               |                               |                               |
|                 | AL9  | 2,3-Butanediol          | 24347-58-8 | Buttery, creamy        | 43.21 $\pm$ 0.16 <sup>a</sup>          | 10.79 $\pm$ 0.03 <sup>b</sup> | 10.96 $\pm$ 0.01 <sup>b</sup> | 10.87 $\pm$ 0.01 <sup>b</sup> |
|                 | AL10 | 2,4-Di-tert-butylphenol | 96-76-4    | Phenolic               | 0.57 $\pm$ 0.01 <sup>a</sup>           | 0.22 $\pm$ 0.01 <sup>d</sup>  | 0.30 $\pm$ 0.01 <sup>b</sup>  | 0.25 $\pm$ 0.01 <sup>c</sup>  |
|                 | AL11 | 2-Butanol, 1-methoxy-   | 53778-73-7 |                        | n.d                                    | n.d                           | 0.23 $\pm$ 0.01 <sup>a</sup>  | n.d                           |
|                 | AL12 |                         | 628-99-9   | Orange, rose, mushroom | 0.20 $\pm$ 0.00 <sup>b</sup>           | n.d                           | 0.45 $\pm$ 0.01 <sup>a</sup>  | n.d                           |
|                 |      | 2-Nonanol               |            |                        |                                        |                               |                               |                               |
|                 | AL13 | Benzyl alcohol          | 100-51-6   | Walnut, nutty          | 2.45 $\pm$ 0.01 <sup>a</sup>           | 0.95 $\pm$ 0.02 <sup>b</sup>  | 0.86 $\pm$ 0.01 <sup>c</sup>  | 0.95 $\pm$ 0.01 <sup>b</sup>  |
|                 | AL14 | Phenol                  | 108-95-2   | Plastic, rubber        | n.d                                    | 1.23 $\pm$ 0.03 <sup>b</sup>  | n.d                           | 1.28 $\pm$ 0.01 <sup>a</sup>  |
|                 | AL15 | Phenol, 4-ethyl-        | 123-7-9    | Phenol                 | n.d                                    | 0.93 $\pm$ 0.02 <sup>a</sup>  | n.d                           | 0.52 $\pm$ 0.01 <sup>b</sup>  |

|       |       |                             |            |                            |                                      |                                      |                                      |                                      |
|-------|-------|-----------------------------|------------|----------------------------|--------------------------------------|--------------------------------------|--------------------------------------|--------------------------------------|
| Acids | AL16  |                             | 60-12-8    | Floral, rosy, honey, spice | $0.83 \pm 0.01^d$                    | $15.93 \pm 0.03^a$                   | $15.12 \pm 0.02^b$                   | $14.95 \pm 0.02^c$                   |
|       |       | Phenylethyl alcohol         |            |                            |                                      |                                      |                                      |                                      |
|       | AL17  | Thymol                      | 89-83-8    | Herb, pleasant             | n.d                                  | $2.63 \pm 0.01^a$                    | n.d                                  | n.d                                  |
|       |       | <b>Subtotal</b>             |            |                            | <b><math>54.53 \pm 0.12^a</math></b> | <b><math>33.75 \pm 0.01^b</math></b> | <b><math>29.44 \pm 0.01^d</math></b> | <b><math>31.37 \pm 0.03^c</math></b> |
|       | ACD1  | 2-Heptenoic acid            | 18999-28-5 | Green, fruity              | $1.29 \pm 0.01^a$                    | n.d                                  | n.d                                  | n.d                                  |
|       | ACD2  | 2-Octenoic acid             | 1470-50-4  |                            | n.d                                  | $0.21 \pm 0.01^a$                    | $0.15 \pm 0.02^b$                    | n.d                                  |
|       | ACD3  | 3-Decenoic acid, (E)-       | 53678-20-9 |                            | n.d                                  | $0.19 \pm 0.01^b$                    | $0.23 \pm 0.02^a$                    | n.d                                  |
|       | ACD4  | 3-Hexenoic acid, (E)-       | 1577-18-0  | Must, fat                  | $0.34 \pm 0.00^a$                    | n.d                                  | n.d                                  | n.d                                  |
|       | ACD5  | 3-Octenoic acid, (E)-       | 5163-67-7  |                            | $0.53 \pm 0.01^a$                    | n.d                                  | $0.36 \pm 0.01^b$                    | n.d                                  |
|       | ACD6  | Benzoic acid                | 65-85-0    | Leather                    | $1.04 \pm 0.01^c$                    | n.d                                  | $3.31 \pm 0.01^a$                    | $1.13 \pm 0.01^c$                    |
|       | ACD7  | Benzoic acid, p-tert-butyl- | 98-73-7    |                            | $0.24 \pm 0.00^a$                    | n.d                                  | n.d                                  | n.d                                  |
|       | ACD8  | Butanoic acid, 2-methyl-    | 116-53-0   | Cheesy, sweaty             | $0.33 \pm 0.00^a$                    | n.d                                  | n.d                                  | n.d                                  |
|       | ACD9  |                             | 503-74-2   | Rancid, cheesy,            | $0.28 \pm 0.00^a$                    | n.d                                  | n.d                                  | n.d                                  |
|       |       | Butanoic acid, 3-methyl-    |            | sweaty                     |                                      |                                      |                                      |                                      |
|       | ACD10 | Dodecanoic acid             | 143-7-7    | Rancid, moldy              | $2.46 \pm 0.01^a$                    | $2.21 \pm 0.01^b$                    | $1.94 \pm 0.01^d$                    | $2.08 \pm 0.00^c$                    |
|       | ACD11 | Heptanoic acid              | 111-14-8   | Rancid, fatty              | $0.66 \pm 0.00^c$                    | $0.87 \pm 0.02^b$                    | $1.92 \pm 0.01^a$                    | $0.65 \pm 0.00^c$                    |
|       | ACD12 | Hexanoic acid               | 142-62-1   | Cheesy, fatty              | $7.98 \pm 0.05^a$                    | $1.27 \pm 0.02^b$                    | n.d                                  | n.d                                  |
|       | ACD13 | Hydrocinnamic acid          | 501-52-0   | Cheesy                     | $0.65 \pm 0.01^b$                    | $0.65 \pm 0.01^b$                    | $0.51 \pm 0.01^c$                    | $0.75 \pm 0.01^a$                    |
|       | ACD14 | n-Decanoic acid             | 334-48-5   | Fatty, citrus              | $7.17 \pm 0.04^a$                    | $1.38 \pm 0.02^c$                    | $1.53 \pm 0.01^b$                    | $0.98 \pm 0.01^d$                    |
|       | ACD15 | Nonanoic acid               | 112-5-0    | Waxy, cheese-like          | $2.36 \pm 0.01^a$                    | $2.00 \pm 0.02^b$                    | n.d                                  | $0.59 \pm 0.01^c$                    |
|       | ACD16 | Octanoic acid               | 124-7-2    | Fatty, rancid              | $4.00 \pm 0.01^a$                    | $2.10 \pm 0.03^c$                    | $3.71 \pm 0.01^b$                    | $1.71 \pm 0.00^d$                    |
|       | ACD17 | Pentanoic acid              | 109-52-4   | Sweet                      | $0.78 \pm 0.00^a$                    | $0.42 \pm 0.00^b$                    | n.d                                  | n.d                                  |
|       | ACD18 | Pentanoic acid, 3-methyl-   | 105-43-1   | Cheesy, fruity             | $0.74 \pm 0.01^a$                    | n.d                                  | n.d                                  | n.d                                  |

|           |       |                               |            |                          |                                 |                                 |                                 |                                 |
|-----------|-------|-------------------------------|------------|--------------------------|---------------------------------|---------------------------------|---------------------------------|---------------------------------|
|           | ACD19 | Tetradecanoic acid            | 544-63-8   | Waxy, fatty, coconut     | 0.33 ± 0.01 <sup>a</sup>        | n.d                             | n.d                             | n.d                             |
|           |       | <b>Subtotal</b>               |            |                          | <b>31.17 ± 0.10<sup>a</sup></b> | <b>11.30 ± 0.08<sup>c</sup></b> | <b>13.65 ± 0.03<sup>b</sup></b> | <b>7.89 ± 0.02<sup>d</sup></b>  |
| Ketones   | KTN1  | 2-Pentanone, 5-methoxy-       | 17429-4-8  |                          | 1.42 ± 0.01 <sup>a</sup>        | n.d                             | n.d                             | n.d                             |
|           | KTN2  | 2-Hydroxy-3-hexanone          | 54073-43-7 |                          | 1.20 ± 0.00 <sup>a</sup>        | n.d                             | n.d                             | n.d                             |
|           | KTN3  | 2-Nonanone                    | 821-55-6   | Vegetable, moldy         | 2.07 ± 0.01 <sup>a</sup>        | n.d                             | n.d                             | n.d                             |
|           |       | <b>Subtotal</b>               |            |                          | <b>4.69 ± 0.01<sup>a</sup></b>  |                                 |                                 |                                 |
| Aldehydes | ALD1  | 2-Decenal, (E)-               | 3913-81-3  | Soap, tallow             | n.d                             | n.d                             | 0.31 ± 0.01 <sup>a</sup>        | 0.29 ± 0.02 <sup>a</sup>        |
|           | ALD2  |                               | 100-52-7   | Sweet, almond, cherry    | n.d                             | 3.41 ± 0.01 <sup>b</sup>        | 3.92 ± 0.01 <sup>a</sup>        | 3.21 ± 0.01 <sup>c</sup>        |
|           | ALD3  | Benzaldehyde, 2,4-dimethyl-   | 15764-16-6 | Cherry, almond, vanilla  | 4.25 ± 0.02 <sup>a</sup>        | 0.52 ± 0.01 <sup>c</sup>        | 2.11 ± 0.01 <sup>b</sup>        | 0.52 ± 0.02 <sup>c</sup>        |
|           | ALD5  |                               | 122-78-1   | Rose-like, honey, floral | 0.22 ± 0.02 <sup>d</sup>        | 8.54 ± 0.01 <sup>b</sup>        | 15.43 ± 0.00 <sup>a</sup>       | 7.06 ± 0.02 <sup>c</sup>        |
|           | ALD6  | Decanal                       | 112-31-2   | Soap, tallow             | n.d                             | n.d                             | n.d                             | 0.23 ± 0.01 <sup>a</sup>        |
|           | ALD7  | Heptanal                      | 111-71-7   | Fat, citrus, rancid      | 0.18 ± 0.00 <sup>a</sup>        | n.d                             | n.d                             | n.d                             |
|           | ALD8  | Hexanal                       | 66-25-1    | Green, sweet             | n.d                             | n.d                             | n.d                             | 0.48 ± 0.01 <sup>a</sup>        |
|           | ALD9  | Paraldehyde                   | 123-63-7   | Sweet, pleasant          | n.d                             | n.d                             | n.d                             | 1.28 ± 0.01 <sup>a</sup>        |
|           |       | <b>Subtotal</b>               |            |                          | <b>4.65 ± 0.01<sup>d</sup></b>  | <b>12.46 ± 0.01<sup>c</sup></b> | <b>21.78 ± 0.01<sup>a</sup></b> | <b>13.08 ± 0.03<sup>b</sup></b> |
| Esters    | EST1  | 1-Butanol, 2-methyl-, acetate | 624-41-9   | Fruity, floral           | n.d                             | 3.23 ± 0.02 <sup>b</sup>        | 2.72 ± 0.01 <sup>c</sup>        | 4.75 ± 0.02 <sup>a</sup>        |
|           | EST2  | 1-Butanol, 3-methyl-, acetate | 123-92-2   | Fruity, floral, sweet    | 0.12 ± 0.01 <sup>d</sup>        | 11.33 ± 0.03 <sup>b</sup>       | 9.17 ± 0.01 <sup>c</sup>        | 16.11 ± 0.04 <sup>a</sup>       |

|       |                                        |            |                           |                   |                    |                    |                    |
|-------|----------------------------------------|------------|---------------------------|-------------------|--------------------|--------------------|--------------------|
| EST3  | 1-Methoxy-2-propyl acetate             | 108-65-6   | Fruity                    | n.d               | $0.36 \pm 0.02^a$  | $0.32 \pm 0.01^b$  | n.d                |
| EST4  | 2-Butanol, 3-methyl-, acetate          | 5343-96-4  | Fruity                    | n.d               | n.d                | $0.31 \pm 0.01^a$  | n.d                |
| EST5  | 3-Hexenoic acid, ethyl ester           | 2396-83-0  | Fruity, brandy, wine-like | n.d               | $0.27 \pm 0.02^b$  | $0.31 \pm 0.01^a$  | $0.22 \pm 0.02^c$  |
| EST6  | 3-Methyl-3-buten-1-ol, acetate         | 5205-07-2  | Fruity                    | n.d               | $0.46 \pm 0.02^b$  | n.d                | $0.50 \pm 0.01^a$  |
| EST7  | 7-Octenoic acid, ethyl ester           | 35194-38-8 | Fruity                    | n.d               | $0.51 \pm 0.01^a$  | n.d                | $0.50 \pm 0.01^a$  |
| EST8  | Acetic acid, 2-phenylethyl ester       | 103-45-7   | Fruity, rose              | n.d               | $12.63 \pm 0.01^c$ | $12.68 \pm 0.02^b$ | $14.47 \pm 0.01^a$ |
| EST9  | Acetic acid, butyl ester               | 123-86-4   | Fruity, sweet, solvent    | n.d               | n.d                | n.d                | $0.38 \pm 0.01^a$  |
| EST10 | Acetic acid, pentyl ester              | 628-63-7   | Fruity, apple             | n.d               | n.d                | n.d                | $0.13 \pm 0.02^a$  |
| EST11 | Acetic acid, phenylmethyl ester        | 140-11-4   | Fruity                    | n.d               | $0.95 \pm 0.01^b$  | $0.83 \pm 0.01^c$  | $1.24 \pm 0.01^a$  |
| EST12 | Acetoin acetate                        | 4906-24-5  | Fruity                    | n.d               | $1.50 \pm 0.01^a$  | n.d                | n.d                |
| EST13 | Benzeneacetic acid, ethyl ester        | 101-97-3   | Fruity                    | n.d               | n.d                | n.d                | $0.25 \pm 0.00^a$  |
| EST14 | Benzenepropanoic acid, ethyl ester     | 2021-28-5  | Fruity                    | n.d               | $3.22 \pm 0.01^a$  | n.d                | $2.85 \pm 0.01^b$  |
| EST15 | Benzoic acid, ethyl ester              | 93-89-0    | Fruity, floral            | $0.43 \pm 0.00^d$ | $1.27 \pm 0.01^c$  | $1.83 \pm 0.02^a$  | $1.41 \pm 0.01^b$  |
| EST16 | cis-9-Tetradecenoic acid, propyl ester |            | Fruity                    | n.d               | $0.24 \pm 0.02^a$  | $0.16 \pm 0.01^b$  | $0.15 \pm 0.01^b$  |

|                 |                                                                  |              |                           |                                |                                 |                                 |                                 |
|-----------------|------------------------------------------------------------------|--------------|---------------------------|--------------------------------|---------------------------------|---------------------------------|---------------------------------|
| EST17           | Dodecanoic acid, ethyl ester                                     | 106-33-2     | Fruity                    | n.d                            | 1.06 ± 0.01 <sup>a</sup>        | 1.06 ± 0.01 <sup>a</sup>        | 0.71 ± 0.01 <sup>b</sup>        |
| EST18           | Dodecyl tiglate                                                  | 1231959-17-3 | Fruity                    | n.d                            | n.d                             | n.d                             | 0.18 ± 0.01 <sup>a</sup>        |
| EST19           | Ethyl 4-acetoxybutanoate                                         | 25560-91-2   | Fruity                    | n.d                            | 0.18 ± 0.01 <sup>a</sup>        | n.d                             | 0.19 ± 0.01 <sup>a</sup>        |
| EST20           | Ethyl 9-hexadecenoate                                            | 54546-22-4   | Fruity                    | n.d                            | 0.17 ± 0.02 <sup>a</sup>        | n.d                             | n.d                             |
| EST21           | Ethyl Acetate                                                    | 141-78-6     | Pineapple, fruity         | n.d                            | n.d                             | 0.17 ± 0.01 <sup>a</sup>        | 0.14 ± 0.01 <sup>b</sup>        |
| EST22           | Heptanoic acid, ethyl ester                                      | 106-30-9     | Wine-like, fruity, brandy | n.d                            | n.d                             | 0.26 ± 0.01 <sup>a</sup>        | n.d                             |
| EST23           | Hexadecanoic acid, ethyl ester                                   | 628-97-7     | Fruity                    | n.d                            | 0.55 ± 0.01 <sup>a</sup>        | 0.32 ± 0.01 <sup>b</sup>        | 0.24 ± 0.01 <sup>c</sup>        |
| EST24           | Hexanoic acid, ethyl ester                                       | 123-66-0     | Fruity, apple, banana     | 2.73 ± 0.01 <sup>b</sup>       | 1.58 ± 0.01 <sup>d</sup>        | 3.40 ± 0.01 <sup>a</sup>        | 1.72 ± 0.01 <sup>c</sup>        |
| EST25           | Isoamyl lactate                                                  | 19329-89-6   | Fruity, banana, pear      | n.d                            | 0.25 ± 0.02 <sup>a</sup>        | n.d                             | 0.14 ± 0.02 <sup>b</sup>        |
| EST26           | Methyl salicylate                                                | 119-36-8     | Fruity, peppermint        | 0.44 ± 0.00 <sup>a</sup>       | n.d                             | n.d                             | n.d                             |
| EST27           | Octanoic acid, ethyl ester                                       | 106-32-1     | Brandy, pear, musty       | n.d                            | 0.58 ± 0.02 <sup>b</sup>        | 0.88 ± 0.01 <sup>a</sup>        | 0.51 ± 0.00 <sup>c</sup>        |
| EST28           | Pentanoic acid, ethyl ester                                      | 539-82-2     | Fruity, berry             | n.d                            | 0.41 ± 0.01 <sup>a</sup>        | 0.38 ± 0.01 <sup>b</sup>        | 0.43 ± 0.01 <sup>a</sup>        |
| EST29           | Propanoic acid, 2-hydroxy-, ethyl ester                          | 97-64-3      | Fruity                    | n.d                            | 0.57 ± 0.02 <sup>a</sup>        | n.d                             | 0.17 ± 0.01 <sup>b</sup>        |
| EST30           | Propanoic acid, 2-methyl-, 3-hydroxy-2,2,4-trimethylpentyl ester | 77-68-9      | Fruity                    | n.d                            | 0.32 ± 0.02 <sup>a,b</sup>      | 0.31 ± 0.01 <sup>b</sup>        | 0.35 ± 0.01 <sup>a</sup>        |
| EST31           | Tetradecanoic acid, ethyl ester                                  | 124-6-1      | Soap, mild, polish        | n.d                            | 0.26 ± 0.01 <sup>a</sup>        | n.d                             | n.d                             |
| <b>Subtotal</b> |                                                                  |              |                           | <b>3.72 ± 0.02<sup>d</sup></b> | <b>42.28 ± 0.08<sup>b</sup></b> | <b>35.13 ± 0.03<sup>c</sup></b> | <b>47.75 ± 0.17<sup>a</sup></b> |

|          |      |                                                  |         |     |                          |            |            |            |
|----------|------|--------------------------------------------------|---------|-----|--------------------------|------------|------------|------------|
| Other(s) | NAT1 | Naphthalene, 1,2,3,4-tetrahydro-1,1,6-trimethyl- | 475-3-6 | tar | 1.24 ± 0.00 <sup>a</sup> | n.d        | n.d        | n.d        |
|          |      | <b>Total of volatile compounds</b>               |         |     | <b>100</b>               | <b>100</b> | <b>100</b> | <b>100</b> |

---

Data expressed as mean ± standard deviation. Means in the same row with different superscript letters are significantly different (p < 0.05).

#### Note

CAS- Chemical Abstracts Service; n.d- not detected; JLaAp- *Lactocaseibacillus casei* Lc 122- *Acetobacter pasteurianus* Ap-As.1.41 HuNiang 1.01 puree; JLaAp- *Lactobacillus helveticus* Lh 43- *A. pasteurianus* Ap-As.1.41 HuNiang 1.01 puree; JLaAp- *Lactiplantibacillus plantarum*- *A. pasteurianus* Ap-As.1.41 HuNiang 1.01 puree; (JCON)- puree with no bacteria inoculants (unfermented).



**Table S3.** Electronic nose analysis of bi-cultured jujube purees, JP

| Properties | Description                                       | Sensor bioactives of JP    |                             |                            |                            |
|------------|---------------------------------------------------|----------------------------|-----------------------------|----------------------------|----------------------------|
|            |                                                   | JLcAp                      | JLhAp                       | JLpAp                      | JCON                       |
| W1C        | Aromatic organic compounds                        | 0.04 ± 0.00 <sup>b</sup>   | 0.04 ± 0.01 <sup>b</sup>    | 0.04 ± 0.00 <sup>b</sup>   | 0.22 ± 0.05 <sup>a</sup>   |
| W5S        | Broad range sensitivity                           | 94.73 ± 0.50 <sup>a</sup>  | 105.29 ± 7.01 <sup>a</sup>  | 107.64 ± 0.33 <sup>a</sup> | 67.31 ± 23.23 <sup>a</sup> |
| W3C        | Aromatic compounds                                | 0.08 ± 0.00 <sup>b</sup>   | 0.08 ± 0.01 <sup>b</sup>    | 0.08 ± 0.00 <sup>b</sup>   | 0.34 ± 0.03 <sup>a</sup>   |
| W6S        | Hydrogen gas                                      | 1.52 ± 0.01 <sup>a,b</sup> | 1.45 ± 0.05 <sup>b</sup>    | 1.58 ± 0.02 <sup>a</sup>   | 1.08 ± 0.01 <sup>c</sup>   |
| W5C        | Aromatic-aliphatic compounds                      | 0.05 ± 0.00 <sup>b</sup>   | 0.05 ± 0.00 <sup>b</sup>    | 0.05 ± 0.00 <sup>b</sup>   | 0.31 ± 0.01 <sup>a</sup>   |
| W1S        | Broad-methane                                     | 43.00 ± 0.16 <sup>a</sup>  | 48.88 ± 4.26 <sup>a</sup>   | 46.27 ± 2.48 <sup>a</sup>  | 10.22 ± 2.34 <sup>b</sup>  |
| W1W        | Organic Sulphur compounds and terpenes            | 253.90 ± 1.78 <sup>a</sup> | 270.05 ± 17.53 <sup>a</sup> | 266.66 ± 7.55 <sup>a</sup> | 86.01 ± 2.62 <sup>b</sup>  |
| W2S        | Broad range-alcohols                              | 48.43 ± 0.62 <sup>a</sup>  | 45.98 ± 3.98 <sup>a</sup>   | 50.55 ± 9.84 <sup>a</sup>  | 7.37 ± 1.84 <sup>b</sup>   |
| W2W        | Aromatic, inorganic Sulphur and organic compounds | 5.18 ± 0.01 <sup>a,b</sup> | 4.80 ± 0.16 <sup>b</sup>    | 5.45 ± 0.00 <sup>a</sup>   | 2.50 ± 0.13 <sup>c</sup>   |
| W3S        | Methane and aliphatic organic compounds           | 2.52 ± 0.04 <sup>a</sup>   | 2.70 ± 0.17 <sup>a</sup>    | 2.54 ± 0.00 <sup>a</sup>   | 1.27 ± 0.05 <sup>b</sup>   |

Data expressed as mean ± standard deviation. Means in the same row with different superscript letters are significantly different ( $p < 0.05$ ).

#### Note

JLcAp- *Lactocaseibacillus casei* Lc 122- *Acetobacter pasteurianus* Ap-As.1.41 HuNiang 1.01 puree; JLhAp- *Lactobacillus helveticus* Lh 43- *A. pasteurianus* Ap-As.1.41 HuNiang 1.01 puree; JLpAp- *Lactiplantibacillus plantarum*- *A. pasteurianus* Ap-As.1.41 HuNiang 1.01 puree; (JCON)- puree with no bacteria inoculants (unfermented).

**a**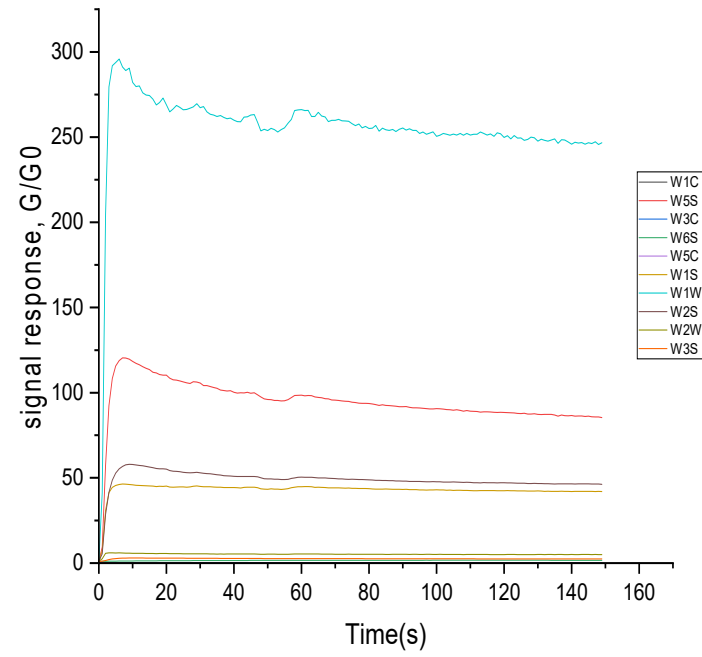**b**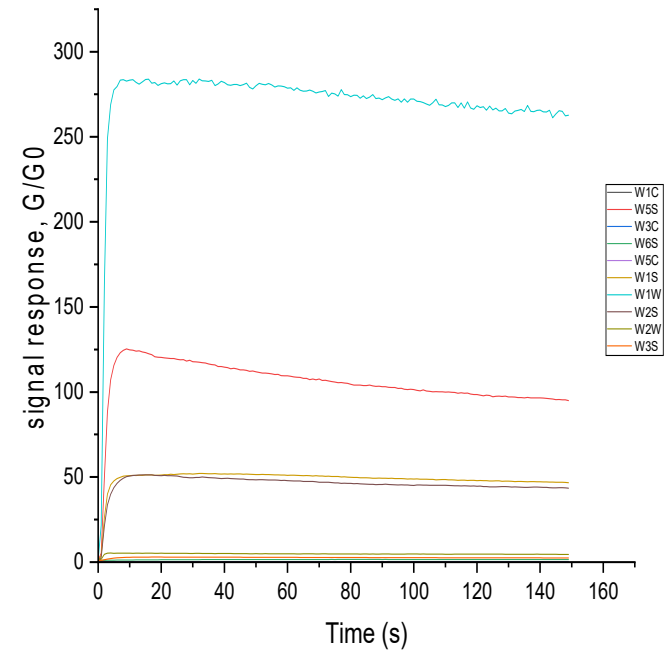

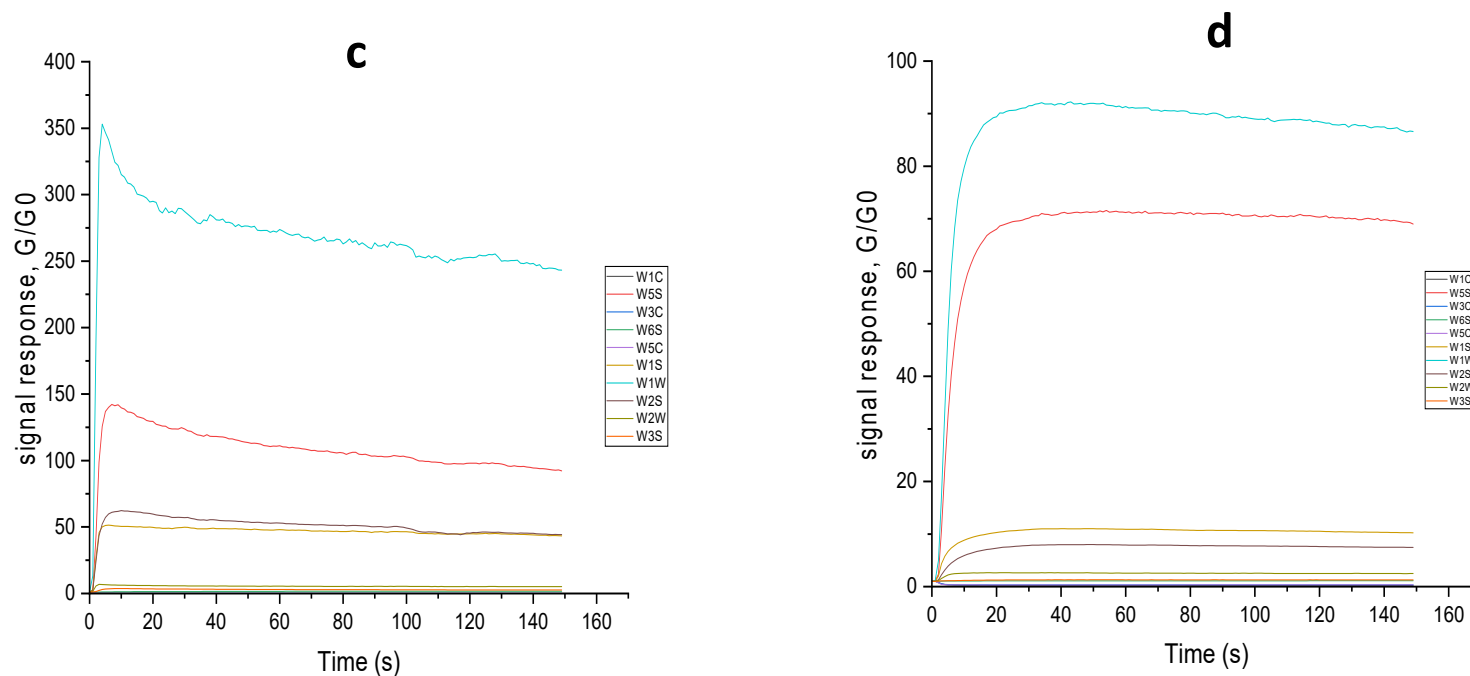

**Fig. S1.** Sensorgrams (a,b,c,d) of electronic nose sensor sensitivities of bi-cultured jujube purees. Sensorgrams: **a-** JLCp; **b-** JLCp; **c-** JLPp; **d-** control.

### Note

W1C- Aromatic organic compounds; W5S- Broad range sensitivity; W3C- Aromatic compounds; W6S- Hydrogen gas; W5C- Aromatic-aliphatic compounds; W1S- Broad-methane; W1W- Organic Sulphur compounds and terpenes; W2S- Broad range-alcohols; W2W- Aromatic, inorganic Sulphur and organic compounds; W3S- Methane and aliphatic organic compounds. JLCp- *Lactocaseibacillus casei* Lc 122- *Acetobacter pasteurianus* Ap-As.1.41 HuNiang 1.01 puree; JLCp- *Lactobacillus helveticus* Lh 43- *A. pasteurianus* Ap-As.1.41 HuNiang 1.01 puree; JLPp- *Lactiplantibacillus plantarum*- *A. pasteurianus* Ap-As.1.41 HuNiang 1.01 puree; (JCON)- puree with no bacteria inoculants (unfermented).

a

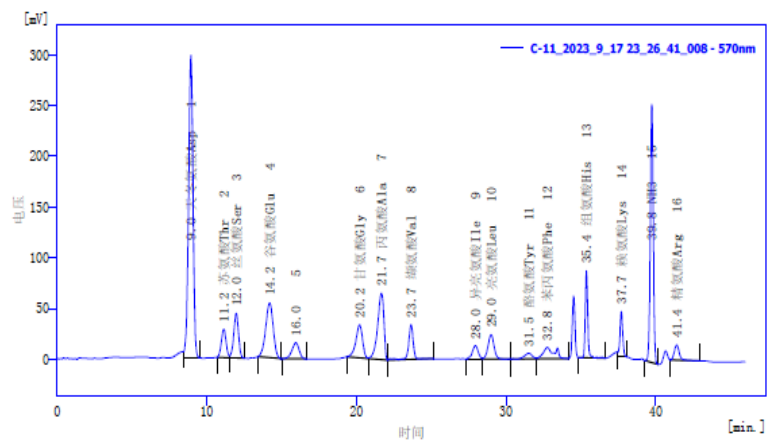

b

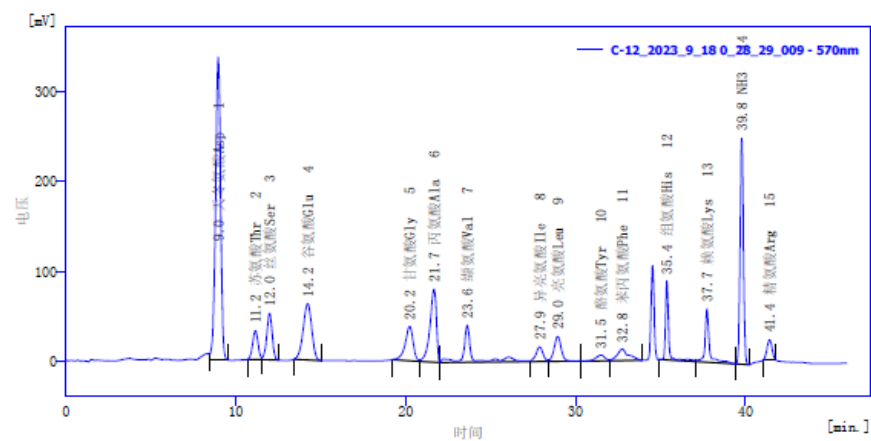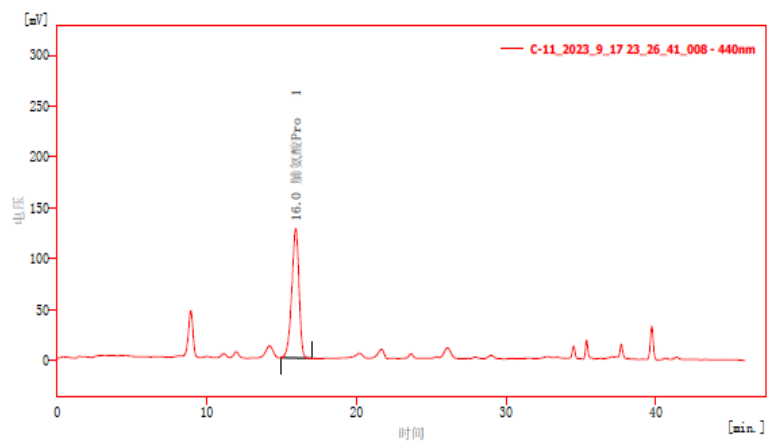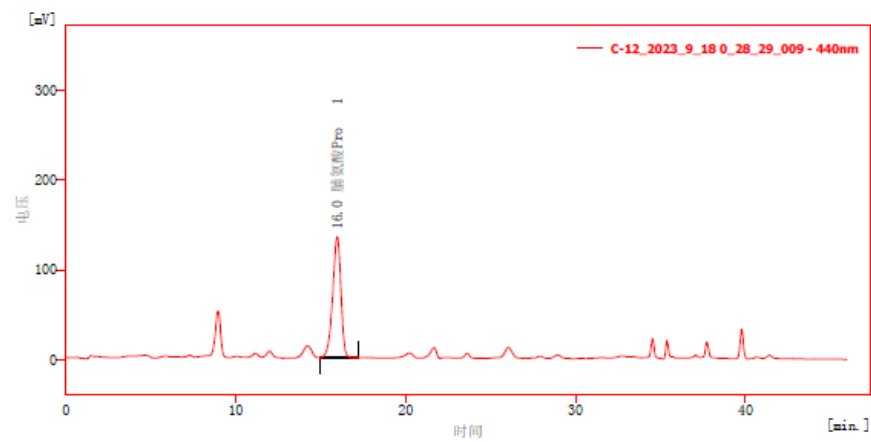

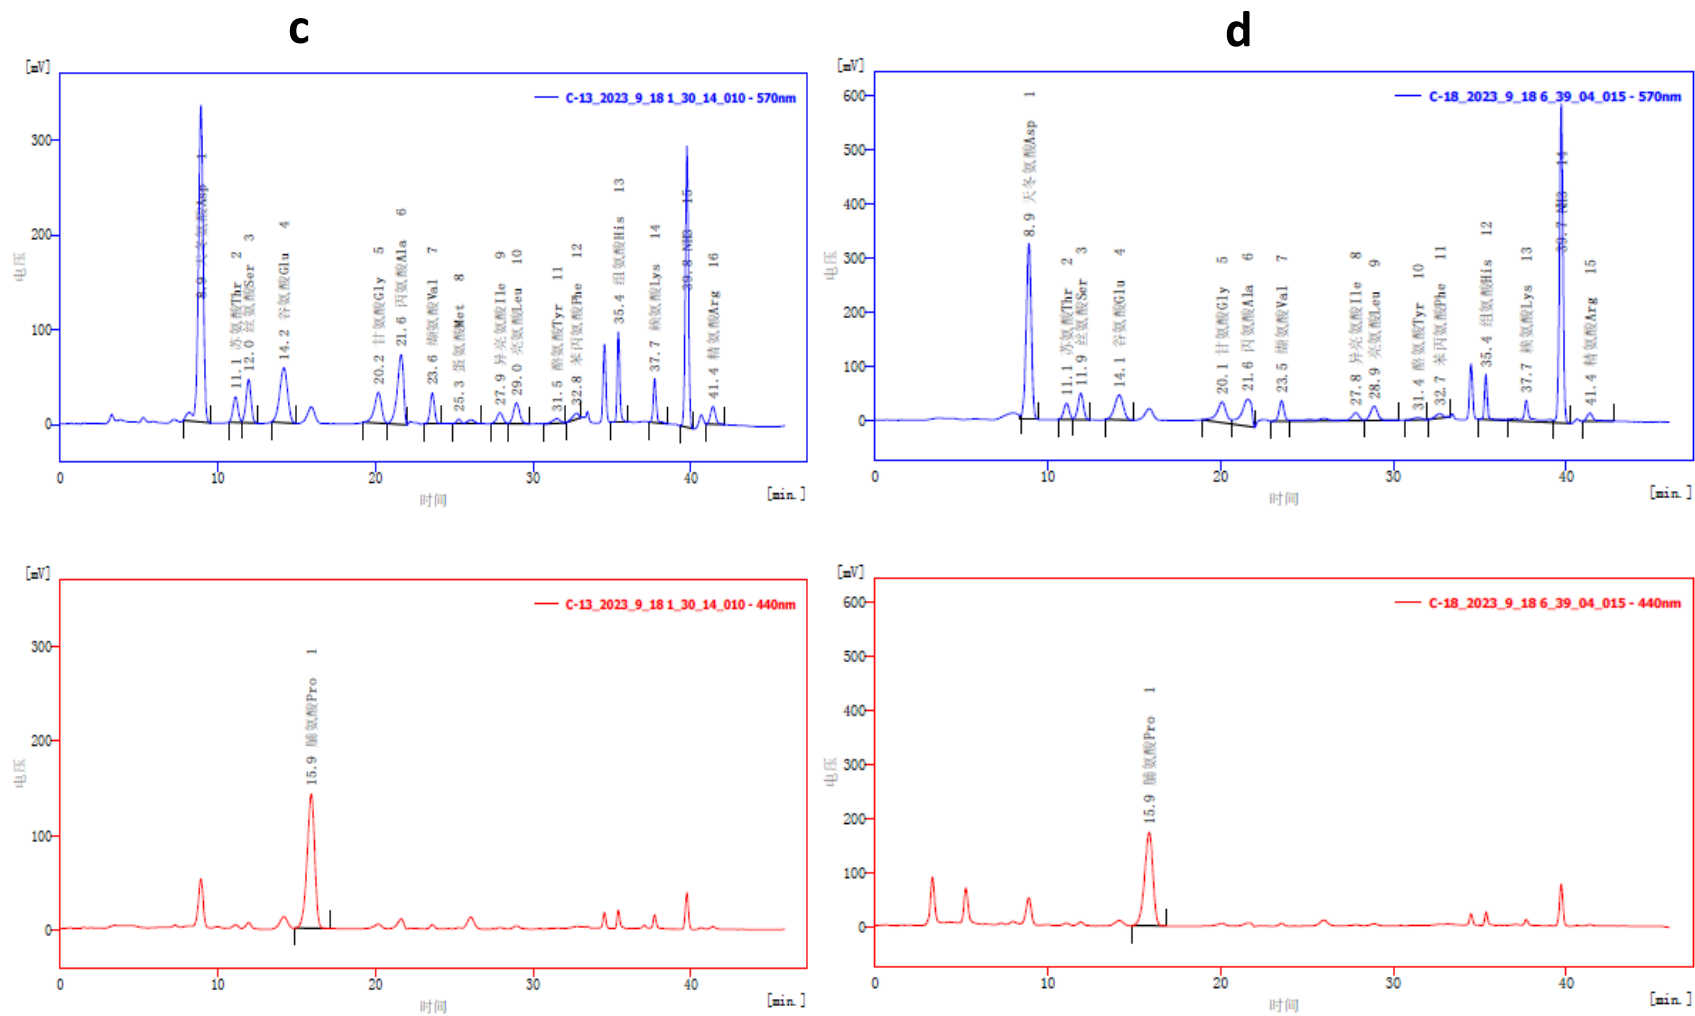

Fig.S2. The chromatographic output of free amino acids in the bicultured jujube purees. Chromatograms: a- JLCaP; b-JLhAp; c- JLPaP; d- control.

**Note.**

JLcAp- *Lactocaseibacillus* casei Lc 122- *Acetobacter pasteurianus* Ap-As.1.41 HuNiang 1.01 puree; JLhAp- *Lactobacillus helveticus* Lh 43- *A. pasteurianus* Ap-As.1.41 HuNiang 1.01 puree; JlpAp- *Lactiplantibacillus* plantarum- *A. pasteurianus* Ap-As.1.41 HuNiang 1.01 puree; (JCON)- puree with no bacteria inoculants (unfermented).

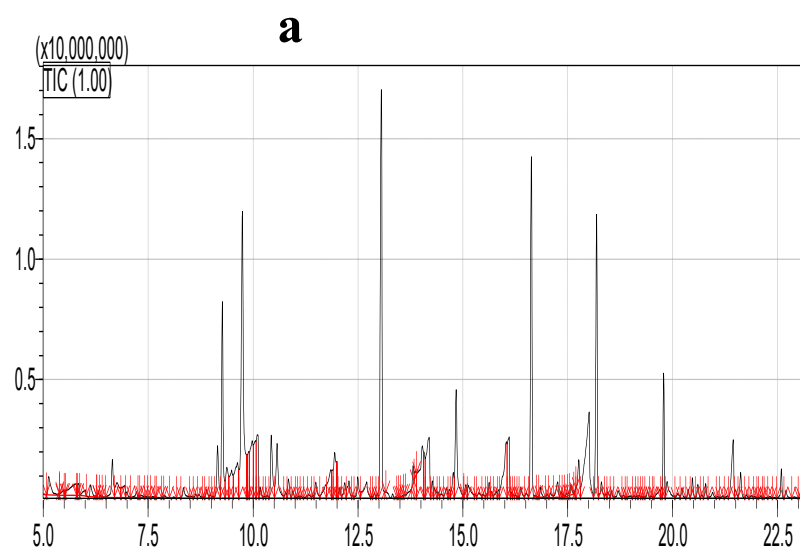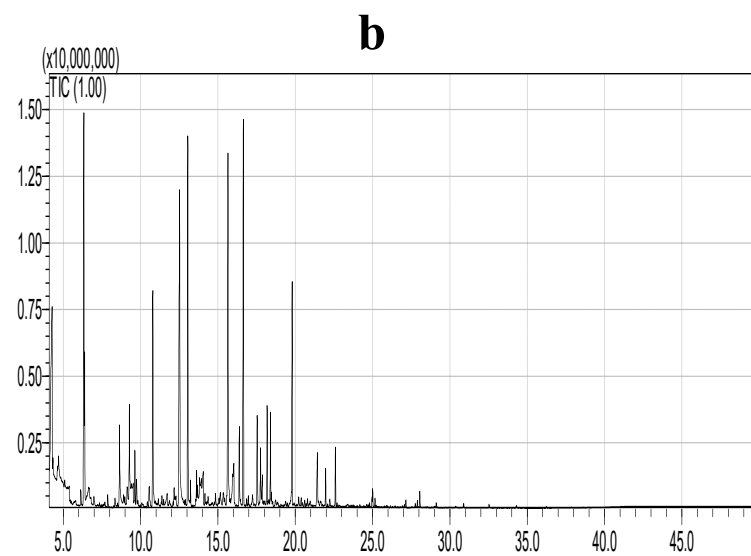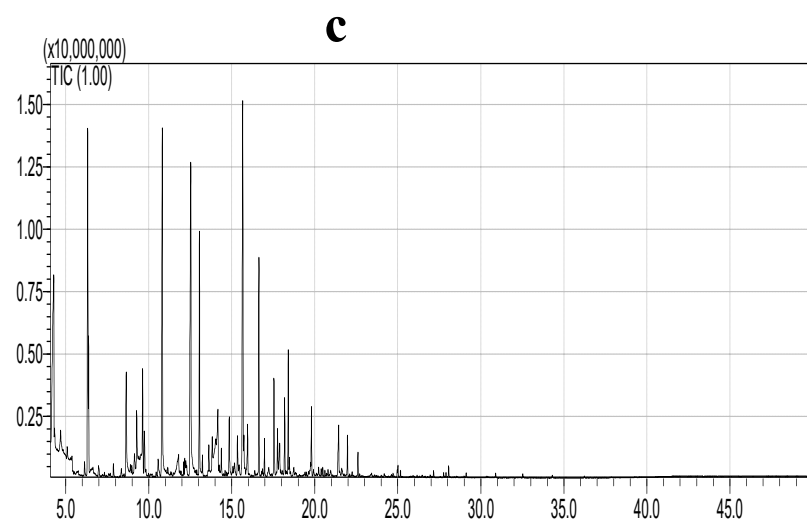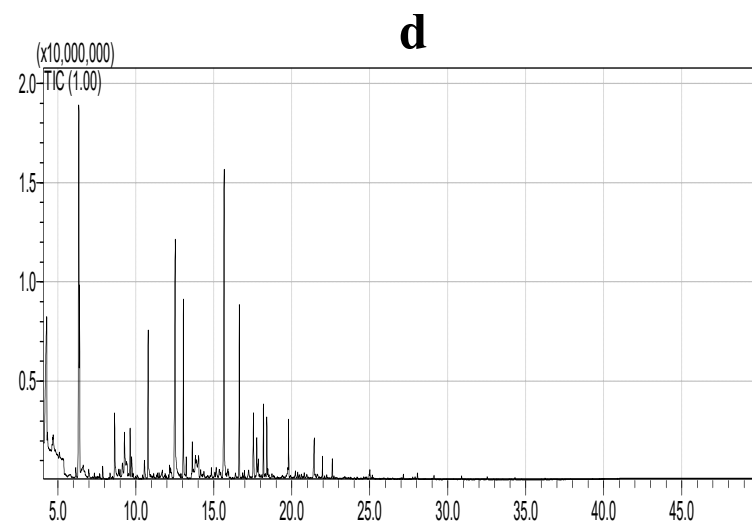

**Fig.S3.** Chromatograms showing relative volatile compounds in bicultured Junzao jujube purees after HS-SPME GC-MS analysis.

**Note**

**a-** puree with no bacteria inoculants (unfermented) (JCON); **b-** *Lactocaseibacillus casei*- *Acetobacter pasteurianus* Ap-As.1.41 HuNiang 1.01 puree (JLcAp); **c-** *Lactobacillus helveticus*- *A. pasteurianus* Ap-As.1.41 HuNiang 1.01 puree (JLhAp); **d-** *Lactiplantibacillus plantarum*- *A. pasteurianus* Ap-As.1.41 HuNiang 1.01 puree (JLpAp)
